# Supplementary material for: Retinitis pigmentosa-associated cystoid macular oedema: pathogenesis and avenues of intervention
Source: PubMed Central journal article supplement — Br J Ophthalmol. 2016 Dec 2;101(1):31–7. doi: 10.1136/bjophthalmol-2016-309376 (PMC5256121; doi:10.1136/bjophthalmol-2016-309376), 2016-12-02
Supplement: bjophthalmol-2016-309376supp_table.pdf [file bjophthalmol-2016-309376supp_table.pdf]

Table 1: A summary to date of the pharmacological, nutritional and surgical interventional studies for RP-CMO

| Authors                              | Year published | Study design                                                     | N (pts) | Intervention                                                                                                                  | Results                                                                                                    | Comments                 | Level of evidence* |
|--------------------------------------|----------------|------------------------------------------------------------------|---------|-------------------------------------------------------------------------------------------------------------------------------|------------------------------------------------------------------------------------------------------------|--------------------------|--------------------|
| <b>Carbonic Anhydrase Inhibitors</b> |                |                                                                  |         |                                                                                                                               |                                                                                                            |                          |                    |
| Liew <i>et al</i>                    | 2015           | Retrospective cohort                                             | 81      | 125 eyes of 64 patients received topical dorzolamide, 32 eyes of 17 patients received oral acetazolamide 250mg BD or 500mg OD | CMT reduction greater in dorzolamide group than acetazolamide group<br>VA improvement both groups          |                          | 3B                 |
| Ginead <i>et al</i>                  | 2010           | Retrospective case series                                        | 32      | Topical dorzolamide 2% TDS or BD for 6 - 58 months                                                                            | CMT improvement more than VA improvement                                                                   |                          | 4                  |
| Fishman <i>et al</i>                 | 1994           | Prospective, placebo-controlled, double-masked, crossover design | 17      | Methazolamide or placebo taken for 3 weeks<br>Sub-group received additional 3/12 methazolamide treatment                      | Angiographic improvement more than VA improvement<br>No change in VA with extended methazolamide treatment |                          | 3B                 |
| Grover <i>et al</i>                  | 2006           | Prospective, non-randomised                                      | 15      | Topical dorzolamide TDS for at least 4 weeks BE                                                                               | CMT improvement more than VA improvement                                                                   | Recurrence in 4 patients | 4                  |

|                          |      |                                       |    |                                                           |                                                                                                                                             |                                                                                                                                |    |
|--------------------------|------|---------------------------------------|----|-----------------------------------------------------------|---------------------------------------------------------------------------------------------------------------------------------------------|--------------------------------------------------------------------------------------------------------------------------------|----|
| Fishman<br><i>et al</i>  | 1989 | Prospective,<br>masked,<br>cross-over | 12 | Oral<br>acetazolamide or<br>placebo for 2<br>week periods | BCVA improved,<br>CMT reduced.<br>Improvement<br>angiographically<br>in almost 50%                                                          | 500 mg/day<br>acetazolamide<br>more effective<br>than 250<br>mg/day                                                            | 3B |
| Ikeda <i>et al</i>       | 2013 | Prospective                           | 10 | Topical<br>dorzolamide 1%<br>TDS BE for 18<br>months      | CMT reduction<br>with majority<br>effect lasting 18<br>months.<br>Macular<br>sensitivity<br>improvement<br>No significant<br>change in BCVA | Recurrence in<br>5 eyes<br>between 12-<br>18 months                                                                            | 4  |
| Ikeda <i>et al</i>       | 2012 | Prospective                           | 9  | Topical<br>dorzolamide 1%<br>TDS BE for 6<br>months       | CMT reduction<br>greater than<br>macular<br>sensitivity<br>improvement<br>No difference in<br>BCVA                                          |                                                                                                                                | 4  |
| Fishman<br><i>et al</i>  | 2007 | Prospective cohort                    | 8  | Topical<br>dorzolamide 2%<br>TDS BE for 7 - 15<br>months  | CMT<br>improvement<br>more than VA<br>improvement                                                                                           | Patients<br>previously<br>included in<br>study by<br>Grover <i>et al</i><br>2006<br>Two patients<br>experienced<br>rebound CMO | 4  |
| Orzalesi<br><i>et al</i> | 1993 | Prospective pilot                     | 7  | Oral<br>acetazolamide for<br>2 weeks then<br>reduced /    | VA<br>improvement                                                                                                                           | Effect<br>independent<br>of reduction                                                                                          | 4  |

|                       |      |                                       |   |                                                                                                                                           |                                                                                                                                                  |                                               |    |
|-----------------------|------|---------------------------------------|---|-------------------------------------------------------------------------------------------------------------------------------------------|--------------------------------------------------------------------------------------------------------------------------------------------------|-----------------------------------------------|----|
|                       |      |                                       |   | maintained / increased according to response<br>Follow-up between 3 weeks – 16 months                                                     |                                                                                                                                                  | of CMO on FFA                                 |    |
| Apushkin <i>et al</i> | 2007 | Prospective cohort                    | 6 | 500 mg oral acetazolamide                                                                                                                 | CMO improved at 3-5 weeks                                                                                                                        | Recurrence at 8-12 weeks                      | 4  |
| Grover <i>et al</i>   | 1997 | Prospective, double-masked, crossover | 5 | Topical dorzolamide or placebo given for 4 weeks followed by crossover treatment for 4 weeks<br>Oral acetazolamide then given for 2 weeks | VA no change using dorzolamide<br>VA improvement using acetazolamide<br>CMO and FFA improvement more marked using acetazolamide than dorzolamide | 4 week flush-out period in between each phase | 3B |
| Pacella <i>et al</i>  | 2014 | Case reports                          | 3 | Topical dorzolamide BE                                                                                                                    | CMT improvement within 7 - 20 days<br>No significant change in VA observed                                                                       |                                               | 4  |
| Thobani & Fishman     | 2011 | Retrospective case series             | 3 | Only 2 patients with RP and CMO. Recurrence whilst taking 500mg oral                                                                      | Improvement of macular oedema. VA not                                                                                                            |                                               | 4  |

|                       |      |                                               |    |                                                                                                                                                      |                                                      |                                                                                                                      |    |
|-----------------------|------|-----------------------------------------------|----|------------------------------------------------------------------------------------------------------------------------------------------------------|------------------------------------------------------|----------------------------------------------------------------------------------------------------------------------|----|
|                       |      |                                               |    | acetazolamide.<br>Re-introduced to treatment after period of discontinuation                                                                         | mentioned in RP patients.                            |                                                                                                                      |    |
| Fishman <i>et al</i>  | 1993 | Prospective                                   | 3  | Oral methazolamide 50mg BD                                                                                                                           | Slight improvement BCVA                              | Recurrence at 6-12 weeks                                                                                             | 4  |
| Chen <i>et al</i>     | 1990 | Case study                                    | 1  | Oral acetazolamide                                                                                                                                   | BCVA improvement<br>RE only<br>Improvement of CMO BE |                                                                                                                      | 4  |
| <b>Steroids</b>       |      |                                               |    |                                                                                                                                                      |                                                      |                                                                                                                      |    |
| Wang <i>et al</i>     | 2003 | Retrospective chart review                    | 50 | Only 2 of these patients were diagnosed with RP-CMO. Single bilateral intravitreal injection of triamcinolone given.                                 | Improvement in CMT and VA.                           |                                                                                                                      | 4  |
| Scorolli <i>et al</i> | 2007 | Prospective, nonrandomised, comparative trial | 40 | 20 eyes received a unilateral single intravitreal injection of triamcinolone acetate, 20 eyes who declined were used as controls<br>1 year follow-up | No significant change in BCVA<br>CMT reduction       | IOP increased after the first day, at 1 month, and at 3 months in both groups but no significant increase afterwards | 3B |

|                      |      |                          |    |                                                                                                                                     |                                                                                                                                   |                                                                                                                                         |   |
|----------------------|------|--------------------------|----|-------------------------------------------------------------------------------------------------------------------------------------|-----------------------------------------------------------------------------------------------------------------------------------|-----------------------------------------------------------------------------------------------------------------------------------------|---|
| Giusti <i>et al</i>  | 2002 | Pilot                    | 10 | Treated for 1 year with oral deflazacort                                                                                            | Near VA, FFA and perimetry improved significantly<br>Distance VA varied only slightly                                             |                                                                                                                                         | 4 |
| Ozdemir <i>et al</i> | 2005 | Prospective small series | 5  | IVTA given<br>Follow up 6-8 months                                                                                                  | CMT improvement<br>No improvement<br>VA seen                                                                                      | Refractory to oral acetazolamide<br>Recurrence in 3 patients between 3 – 6 months                                                       | 4 |
| Srouf <i>et al</i>   | 2013 | Prospective              | 3  | Intravitreal dexamethasone implant (Ozurdex)<br>Follow-up for 6 months                                                              | CMT and VA improvement                                                                                                            | Refractory to oral acetazolamide, sub-tenon triamcinolone, topical NSAID<br>Recurrence at 3 months in 2 patients requiring re-treatment | 4 |
| Schaal <i>et al</i>  | 2016 | Case study               | 1  | Right eye received a sub-tenon injection of triamcinolone<br>A 2 <sup>nd</sup> sub-tenon injection was performed in the right eye 8 | VA and CMT improvement 2-weeks post 1 <sup>st</sup> injection<br>Mild rebound CMO at 8 months following 1 <sup>st</sup> injection | Refractory to oral acetazolamide 500mg OD for 2 years and topical 2% dorzolamide TDS together with topical                              | 4 |

|                      |      |            |   |                                                                                 |                                                                                                               |                                                                                                                                                                                                                       |   |
|----------------------|------|------------|---|---------------------------------------------------------------------------------|---------------------------------------------------------------------------------------------------------------|-----------------------------------------------------------------------------------------------------------------------------------------------------------------------------------------------------------------------|---|
|                      |      |            |   | months following the 1 <sup>st</sup> injection                                  |                                                                                                               | 0.09% bromfenac OD for 1 year<br>IOP increase at 4 months controlled with 0.5% timolol BD                                                                                                                             |   |
| Ahn et al            | 2014 | Case study | 1 | 0.7mg intravitreal Ozurdex                                                      | BCVA improved<br>OCT central thickness improved                                                               | Refractory to oral acetazolamide and intravitreal bevacizumab                                                                                                                                                         | 4 |
| Patil L & Lotery A.J | 2014 | Case study | 1 | Treated with 0.7mg of intravitreal injection of dexamethasone implant (Ozurdex) | VA and CMT improvement, maintained after 10 months<br>Exudation at the disc and the inferior retina resolved. | Patient from De Salvo 2011 study. RE RP-CMO and Coats'-like exudative RD. Refractory to oral acetazolamide, topical dorzolamide, orbital floor injection of depo-medrone and CMO recurrence following initial success | 4 |

|                            |      |            |   |                                                                                                   |                                                         |                                                                                              |   |
|----------------------------|------|------------|---|---------------------------------------------------------------------------------------------------|---------------------------------------------------------|----------------------------------------------------------------------------------------------|---|
|                            |      |            |   |                                                                                                   |                                                         | with cryotherapy.                                                                            |   |
| Alhassan, M & Quintyn, J.C | 2013 | Case study | 1 | Single unilateral intravitreal dexamethasone implant (Ozurdex)                                    | Bilateral BCVA improvement and CMT reduction at 1 month | Refractory to oral acetazolamide 500mg OD and topical brinzolamide BD                        | 4 |
| Barge <i>et al</i>         | 2013 | Case study | 1 | Bilateral intravitreal injections of triamcinolone (IVTA) before sub-tenon depot of triamcinolone | BCVA improved<br>CMT reduced<br>IOP raised BE           | Refractory to oral acetazolamide and topical ketoralac<br>Recurrence at 2-5 months post-IVTA | 4 |
| Buchaim <i>et al</i>       | 2013 | Case study | 1 | Bilateral intravitreal dexamethasone implant (Ozurdex)                                            | BCVA improved<br>No CMO at 4 months                     | Previously received 19 IVTAs RE and 13 IVTAs LE but with decreasing therapeutic effect       | 4 |
| Saati <i>et al</i>         | 2013 | Case study | 1 | Bilateral intravitreal dexamethasone implant (Ozurdex)                                            | CMO resolution at 1/52<br>VA improvement                | Refractory to topical dorzolamide<br>Recurrence BE between 2-3 months                        | 4 |
| Urban <i>et al</i>         | 2009 | Case study | 1 | 4 x unilateral intravitreal triamcinolone                                                         | FT reduction within 3 months                            | Intolerant to oral acetazolamide                                                             | 4 |

|                      |      |            |   |                                                                                                         |                                                                                                                                                                                                                                                                    |                                                                                                                                                |   |
|----------------------|------|------------|---|---------------------------------------------------------------------------------------------------------|--------------------------------------------------------------------------------------------------------------------------------------------------------------------------------------------------------------------------------------------------------------------|------------------------------------------------------------------------------------------------------------------------------------------------|---|
|                      |      |            |   | repeated every 4 months                                                                                 | BCVA improvement<br>Endophthalmitis following 4th IVT diagnosed day of RTA<br>Traumatic inferior RD, migration of triamcinolone into sub-retinal space. Scleral buckling and vitrectomy performed<br>Resolution of CMO observed, however, BCVA remained at 20/100. | Previous autologous plasmin enzyme–assisted vitrectomy without ILM peel                                                                        |   |
| Kim <i>et al</i>     | 2006 | Case study | 1 | 2 x Intravitreal triamcinolone (4mg/0.1ml)<br>RE cataract surgery at 3 months post-1 <sup>st</sup> IVTA | 1 <sup>st</sup> IVTAs resolution of CMO by 1/12.<br>No significant change in VA<br>2nd IVTAs resolution of CMO by 2 weeks                                                                                                                                          | Refractory to oral acetazolamide 500mg for 1 year and sub-tenon triamcinolone 40mg<br>Recurrence in BE at 11 months post 1 <sup>st</sup> IVTA. | 4 |
| Minella <i>et al</i> | 2006 | Case study | 1 | IVTA                                                                                                    | CMT reduced                                                                                                                                                                                                                                                        |                                                                                                                                                | 4 |



|                                                                     |      |                                            |    |                                                                                           |                                                                                                                                 |                                                              |    |
|---------------------------------------------------------------------|------|--------------------------------------------|----|-------------------------------------------------------------------------------------------|---------------------------------------------------------------------------------------------------------------------------------|--------------------------------------------------------------|----|
|                                                                     |      |                                            |    | Follow-up for 6 months                                                                    | No significant change FERG amplitude/phase<br>VA showed a significant tendency to improve                                       |                                                              |    |
| Sallum <i>et al</i>                                                 | 2003 | Case study                                 | 1  | Bilateral IVTAs                                                                           | CMO resolution between 30 - 40 days<br>VA improvement LE only                                                                   | Refractory to oral acetazolamide<br>Recurrence at 6 months   | 4  |
| Saraiva <i>et al</i>                                                | 2003 | Case study                                 | 1  | Bilateral IVTAs                                                                           | CMO reduction<br>VA improvement LE only                                                                                         | Refractory to oral acetazolamide<br>Recurrence at 6 months   | 4  |
| <b>Non-steroidal anti-inflammatory together with steroid or CAI</b> |      |                                            |    |                                                                                           |                                                                                                                                 |                                                              |    |
| Lemos-Reis <i>et al</i>                                             | 2015 | Prospective, randomized and interventional | 18 | 15 eyes received topical ketorolac and 13 eyes received topical dorzolamide for 12 months | No significant change in CMT in either group<br>Improvement BCVA both groups at 6/12 but reduced in dorzolamide group at 1 year |                                                              | 3B |
| Park <i>et al</i>                                                   | 2013 | Case study                                 | 1  | Topical prednisolone and ketorolac 3 months                                               | VA improvement and resolution of CMO at 3 months                                                                                | Treatment re-introduced at 6 months due to recurrence of CMO | 4  |

| <b>Intravitreal anti-vascular endothelial growth factor</b> |      |                    |    |                                                                                                                                                             |                                                                                                                                                                                                              |                                                                                             |    |
|-------------------------------------------------------------|------|--------------------|----|-------------------------------------------------------------------------------------------------------------------------------------------------------------|--------------------------------------------------------------------------------------------------------------------------------------------------------------------------------------------------------------|---------------------------------------------------------------------------------------------|----|
| Artunay <i>et al</i>                                        | 2009 | Prospective cohort | 30 | 15 eyes received intravitreal ranibizumab, 15 eyes remained off treatment                                                                                   | CMT improved but no change in BCVA at 6 months                                                                                                                                                               | Refractory to oral acetazolamide                                                            | 3B |
| Yuzbasioglu <i>et al</i>                                    | 2009 | Prospective        | 7  | Intravitreal bevacizumab                                                                                                                                    | CMT and VA improvement                                                                                                                                                                                       |                                                                                             | 4  |
| Melo <i>et al</i>                                           | 2007 | Case reports       | 2  | Single unilateral intravitreal bevacizumab<br>1st patient received IVTA at 3/12 post IVT<br>2nd patient underwent cataract surgery/IVTA at 1 month post IVT | Unchanged CMT, VA same or worse following IVT<br>1st patient CMT improved following IVTA<br>2nd patient: VA reduced due to lens opacity. VA and CMT improvement documented at 3 months post-cataract surgery | Previously received 2 or 3 IVTAs with transient VA improvement                              | 4  |
| Strong <i>et al</i>                                         | 2016 | Case report        | 1  | Bilateral intravitreal injections of Eylea                                                                                                                  | CMT improvement                                                                                                                                                                                              | Refractory to topical dorzolamide. Minimal response previously to intravitreal ranibizumab. | 4  |

|                         |      |             |    |                                                                                                             |                                                                          |                                                                                                                              |    |
|-------------------------|------|-------------|----|-------------------------------------------------------------------------------------------------------------|--------------------------------------------------------------------------|------------------------------------------------------------------------------------------------------------------------------|----|
| Moustafa <i>et al</i>   | 2015 | Case study  | 1  | Single unilateral intravitreal injection of aflibercept                                                     | VA and CMT improvement<br>No significant multifocal ERG changes          | Improvements maintained at 6 months                                                                                          | 4  |
| Shah <i>et al</i>       | 2010 | Case study  | 1  | 3 x Intravitreal unilateral injections of ranibizumab                                                       | CMT reduction<br>BCVA improvement after 3 <sup>rd</sup> IVT              | Unable to tolerate PO acetazolamide<br>Refractory to topical dorzolamide<br>Recurrence at 3 months after 3 <sup>rd</sup> IVT | 4  |
| Querques <i>et al</i>   | 2009 | Case study  | 1  | Single unilateral intravitreal injection of pegaptanib sodium 0.3mg given whilst PO acetazolamide continued | VA and CMT improvement<br>No recurrence of CMO seen at 4 months post-IVT | Refractory to oral acetazolamide                                                                                             | 4  |
| <b>Oral lutein</b>      |      |             |    |                                                                                                             |                                                                          |                                                                                                                              |    |
| Adackapara <i>et al</i> | 2008 | Prospective | 39 | Patients already enrolled in phase I/II clinical trial with double-masked, placebo-lutein, crossover design | No significant effect on CMT in patients with, or without CMO            | 19 / 39 patients had RP-CMO, 20 /39 patients had RP without CMO                                                              | 3B |
| <b>Laser</b>            |      |             |    |                                                                                                             |                                                                          |                                                                                                                              |    |

|                           |      |                                         |    |                                                                                       |                                                                                      |                                                                                                                             |   |
|---------------------------|------|-----------------------------------------|----|---------------------------------------------------------------------------------------|--------------------------------------------------------------------------------------|-----------------------------------------------------------------------------------------------------------------------------|---|
| Newson <i>et al</i>       | 1987 | Prospective pilot                       | 16 | Unilateral grid photocoagulation performed<br>Follow-up between 4 - 21 months         | Decreased dye accumulation on FFA<br>VA better in treated compared to untreated eyes |                                                                                                                             | 4 |
| <b>Vitrectomy</b>         |      |                                         |    |                                                                                       |                                                                                      |                                                                                                                             |   |
| Garcia-Arumi <i>et al</i> | 2003 | Prospective non-comparative case series | 8  | Pars plana vitrectomy with ILM peel                                                   | VA and CMT improvement                                                               | Refractory to oral acetazolamide 250mg BD for 1 month                                                                       | 4 |
| <b>Other</b>              |      |                                         |    |                                                                                       |                                                                                      |                                                                                                                             |   |
| Siqueira <i>et al</i>     | 2013 | Case report within phase 2 study        | 1  | Unilateral intravitreal autologous BM-derived hematopoietic stem cell transplantation | CMO resolution and VA/macular sensitivity improvement                                | Refractory to oral acetazolamide and topical dorzolamide                                                                    | 4 |
| De Salvo <i>et al</i>     | 2011 | Case study                              | 1  | Cryotherapy applied to infero-temporal quadrant of RE retina                          | Slight increase BCVA with mild residual CMO at 6 months                              | Coats'-like exudative RD.<br>Refractory to oral acetazolamide , topical dorzolamide and orbital floor injection depomedrone | 4 |

\*Oxford Centre for evidence-based medicine – Levels of evidence (March 2009)

## Abbreviations

BCVA: best corrected visual acuity

BM: bone marrow

CMO: cystoid macular oedema

CMT: central macular thickness

ERG: electroretinogram

FERG: focal electroretinogram

FFA: fundus fluorescein angiogram

FT: foveal thickness

ILM: internal limiting membrane

IOL: intra-ocular lens

IOP: intra-ocular pressure

IVT: intravitreal treatment

IVTA: intravitreal triamcinolone

NSAID: non-steroidal anti-inflammatory

OCT: optical coherence tomography

OD/BD/TDS: once per day/twice per day/three times per day

Pts: patients

RD: retinal detachment

RE/LE/BE: right eye/left eye/both eyes

RTA: road traffic accident

VA: visual acuity
